# Supplementary material
Source: Springer Nature journal article supplement (https://www.springermedizin.de/resource/supplementary/12889_2011_4600_MOESM1_ESM.pdf/9491414)
Supplement: MOESM1 [file 9491414]

Enrolments from 01/01-31/12/07 (n = 1089)

- Did not qualify (n = 3)
- Did not start (n = 14)
- Unresolved queries and key missing data (n = 49)
- Still in progress (n = 322)

Eligible study cohort (n = 701)

Orthopaedic  
(n = 164)

Mental health  
(n = 141)

Respiratory  
(n = 34)

Metabolic  
(n = 228)

Cardiovascular  
(n = 111)

Others  
(n = 23)
